# Supplementary material for: Sustainable, Rapid Synthesis of Bright-Luminescent CuInS2-ZnS Alloyed Nanocrystals: Multistage Nano-xenotoxicity Assessment and Intravital Fluorescence Bioimaging in Zebrafish-Embryos
Source: PubMed Central journal article supplement (PMC4870560; doi:10.1038/srep26078), 2016-05-18
Supplement: srep26078-s1.pdf [file srep26078-s1.pdf]

## Supplementary information

### **Sustainable, Rapid Synthesis of Bright-Luminescent CuInS<sub>2</sub>-ZnS Alloyed Nanocrystals: Multistage Nano-xenotoxicity Assessment and Intravital Fluorescence Bioimaging in Zebrafish-Embryos**

**S. Shashank Chetty<sup>a</sup>, S. Praneetha<sup>a</sup>, Sandeep Basu<sup>bc</sup>, Chetana Sachidanandan<sup>bc</sup> and A. Vadivel Murugan<sup>a\*</sup>,**

<sup>a</sup>*Advanced Functional Nanostructured Materials Laboratory, Centre for Nanoscience and Technology, Madanjeet School of Green Energy Technologies, Pondicherry University, (A Central University), Dr. R. V. Nagar, Kalapet, Puducherry-605014, India.*

<sup>b</sup>*Council of Scientific and Industrial Research-Institute of Genomics & Integrative Biology (CSIR-IGIB), South Campus, New Delhi 110025, India*

<sup>c</sup>*Academy of Scientific and Innovative Research (AcSIR), New Delhi*

\*Tel. +91-413-2654975, E-mail:avmrjeshwar@gmail.com; avmurugan.nst@pondiuni.edu.in.

---

**Preparation of Zinc Stearate<sup>1</sup>.** Briefly, 10 mM SA was dissolved in 20 mL of methanol by heating at 50 °C to obtain a clear solution. To the above solution, 16 mM of TMAH in 5 mL of methanol was added dropwise and stirred for 20 mins. Further, 5 mM ZnCl<sub>2</sub> in 10 mL of methanol was added dropwise under vigorous stirring to obtain white precipitate solution. This solution was centrifuged, washed and vacuum dried to obtain pristine zinc stearate.

**Phase transformation of Oil soluble CIZS-NCs<sup>2</sup>.** Water soluble CIZS-NCs was prepared by exchanging hydrophobic ligand (DDT) with hydrophilic ligand (MUA). 0.5 g MUA was dissolved in 5 mL of methanol and adjusted to pH 9 using TMAH. 0.5 mL of above MUA-methanol solution was added to purified 5 mL of CIZS-NCs in chloroform and stirred for 30 min at 70 °C. Further, 5 mL of distilled water was added and kept stirring for another 20 min. Finally,

the complete solution was separated into two phases (organic/aqueous) with CIZS-NCs phase-transferred into supernatant aqueous phase. The water-soluble MUA-capped CIZS-NCs were collected and stored at room-temperature.

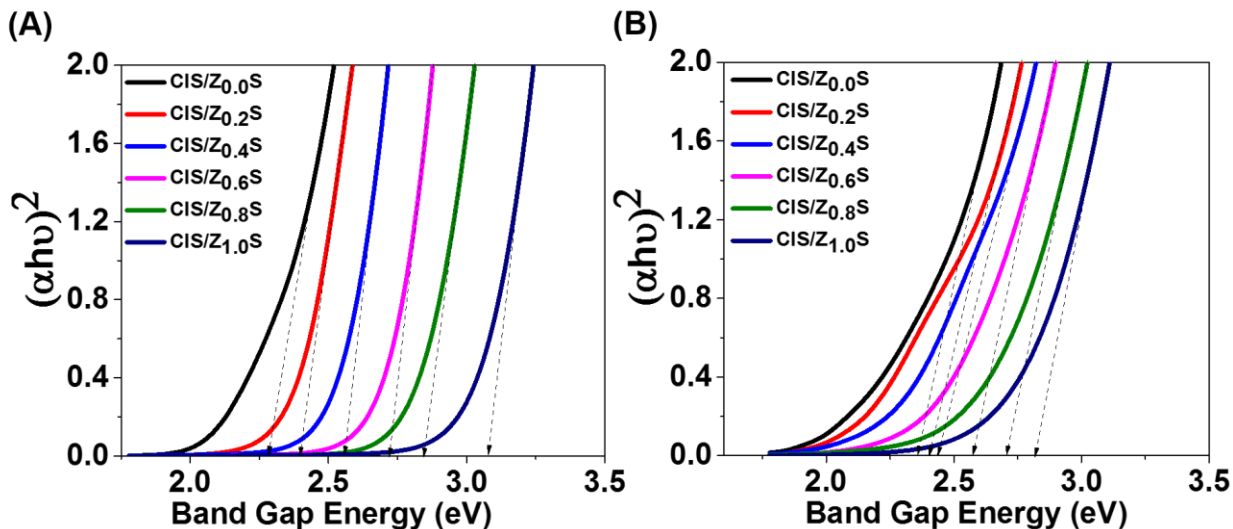

**Figure SI-1 | Tauc plot.** Zinc concentration dependent optical bandgap of MW-ST synthesized CIZS-NCs at (a) 200 °C and (b) 230 °C

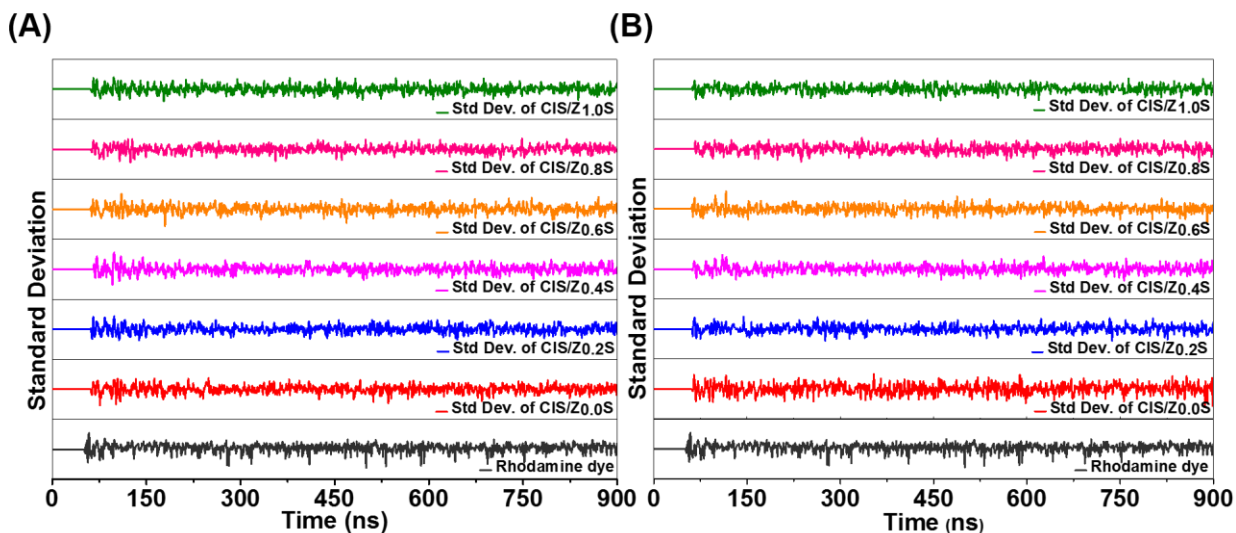

**Figure SI-2 | Standard deviation plot of tri-exponential fitting.** Shows dynamic PL exponential decay curve of synthesized CIZS-NCs at (A) 200 °C and (B) 230 °C.

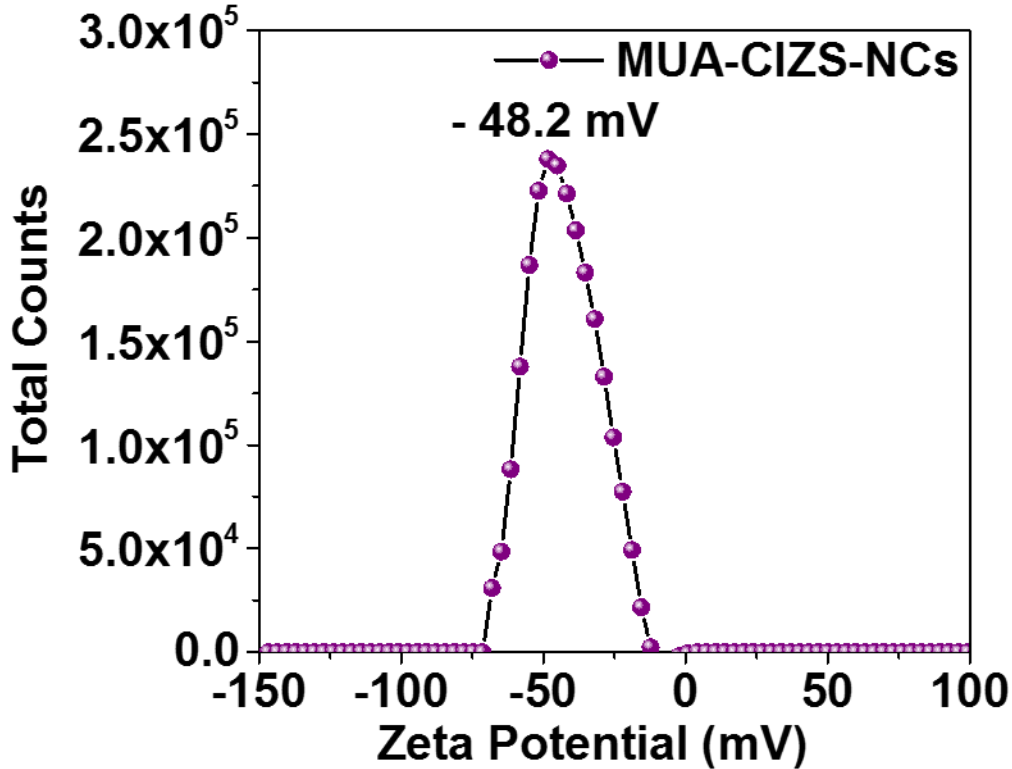

**Figure SI-3 | Zeta ( $\zeta$ ) potential analysis.** Shows Zeta potential spectrum of phase-transferred MUA-functionalized CIZS-NCs.

**Real-time quantitative PCR.** Six biological replicate pools of zebrafish embryos (each pool, N=20) were used for each sample. RNA was isolated using RNA isoplus (Takara)<sup>3</sup>. Purity was assessed by 260/280 nm absorbance ratios in Nanodrop1000 (Thermo scientific) and quality was monitored by agarose gel electrophoresis. On average 1 $\mu$ g RNA was used for cDNA synthesis. One control cDNAs was subjected to PCR amplification with serial dilutions to check the amplification efficiency of primers used in qRT-PCR. cDNA was synthesized by using QuantiTect Reverse Transcription kit (Qiagen) and realtime quantitative PCR was performed by using sybr green chemistry (Roche) in Light cycler-480 (Roche) platform. The fold change with respect to control was calculated by the  $2^{-\Delta\Delta CT}$  algorithm (known as the delta-delta-Ct or ddCt algorithm)<sup>4</sup>. The data were normalized to the endogenous control 18s ribosomal protein small (RPL113  $\alpha$ ) gene. Melting and amplification curve analysis was also performed to check the specificity of product.

**Reference.**

1. Jana, S. *et al.* Prevention of Photooxidation in Blue-Green Emitting Cu doped ZnSe Nanocrystals. *Chem Comm.* (2010).
2. Zhang, W. *et al.* Design and Synthesis of Highly Luminescent Near-Infrared-Emitting Water-Soluble CdTe/CdSe/ZnS Core/Shell/Shell Quantum Dots. *Inorg. Chem.* 48, 9723-9731 (2009).
3. Peterson, S.M. and Freeman, J.L. RNA Isolation from Embryonic Zebrafish and cDNA Synthesis for Gene Expression Analysis. *Journal of Visualized Experiments : JoVE.* 30, 1470 (2009).
4. Livak, K. J. and Schmittgen, T. D. Analysis of relative gene expression data using real-time quantitative PCR and the  $2^{-\Delta\Delta C_T}$  method. *Methods*, 25, 402-408. (2001)
